# Supplementary material for: Supergiant porphyry Cu deposits are failed large eruptions
Source: Research Square preprint supplement (doi:10.21203/rs.3.rs-802055/v1), 2021-08-11
Supplement: Supplementary file 1 [file 0e6c86b98eed6dac5e133d26.docx]

**Supplementary Material**

**Supergiant porphyry Cu deposits are failed large eruptions**

*Massimo Chiaradia1* & Luca Caricchi1*

*1 Department of Earth Sciences, University of Geneva, Rue des Maraîchers 13, 1205 Geneva, Switzerland*

*e-mails:* [*Massimo.Chiaradia@unige.ch*](mailto:Massimo.Chiaradia@unige.ch)*,* [*Luca.Caricchi@unige.ch*](mailto:Luca.Caricchi@unige.ch)

*Tel. : +41 22 3796634*

** Corresponding author*

***RStudio script***

ns= 500000

################INPUT PARAMETERS ###############

MtCu<- runif(min=0, max=150, ns) #Mt

a<- runif(min=60, max=700, ns) #aa in equation

b<- -0.187767*log(a)+ 1.507068 #bb in equation

MagmaVol<- a*MtCu^b #km3

Pulses<- runif(min=5, max=20, ns) #N of pulses

PulseVolume1<- MagmaVol/Pulses # km3

PulseDuration<- runif(min=10000, max=100000, ns) #years

flux<- PulseVolume1/PulseDuration #km3a-1

log10flux<- log10(flux) #km3a-1

Magmaduration<- PulseDuration*Pulses

MtCuVol50<- subset(MtCu, PulseVolume1<50)

MtCuVol100<- subset(MtCu, PulseVolume1>50 & PulseVolume1<100)

MtCuVol150<- subset(MtCu, PulseVolume1>100 & PulseVolume1<150)

MtCuVol300<- subset(MtCu, PulseVolume1>150 & PulseVolume1<300)

MtCuVol350<- subset(MtCu, PulseVolume1>300)

log10fluxVol50<- subset(log10flux, PulseVolume1<50)

log10fluxVol100<- subset(log10flux, PulseVolume1>50 & PulseVolume1<100)

log10fluxVol150<- subset(log10flux, PulseVolume1>100 & PulseVolume1<150)

log10fluxVol300<- subset(log10flux, PulseVolume1>150 & PulseVolume1<300)

log10fluxVol350<- subset(log10flux, PulseVolume1>300)

log10fluxCu10<- subset(log10flux, MtCu<10)

log10fluxCu30<- subset(log10flux, MtCu>10 & MtCu<30)

log10fluxCu50<- subset(log10flux, MtCu>30 & MtCu<50)

log10fluxCu70<- subset(log10flux, MtCu>50 & MtCu<70)

log10fluxCu100<- subset(log10flux, MtCu>70 & MtCu<100)

log10fluxCu140<- subset(log10flux, MtCu>100)

PulseVolumePulse7_5<- subset(PulseVolume1, Pulses<10)

PulseVolumePulse10<- subset(PulseVolume1, Pulses>10 & Pulses<15)

PulseVolumePulse12_5<- subset(PulseVolume1, Pulses>15 & Pulses<20)

PulseVolumePulse15<- subset(PulseVolume1, Pulses>20)

Pulses05<- subset(Pulses, Magmaduration<500000)

Pulses0510<- subset(Pulses, Magmaduration>500000 & Magmaduration<1000000)

Pulses1015<- subset(Pulses, Magmaduration>1000000 & Magmaduration<1500000)

Pulses1520<- subset(Pulses, Magmaduration>1500000 & Magmaduration<2000000)

Pulses20<- subset(Pulses, Magmaduration>2000000)

PulseVolume05<- subset(PulseVolume1, Magmaduration<500000)

PulseVolume0510<- subset(PulseVolume1, Magmaduration>500000 & Magmaduration<1000000)

PulseVolume1015<- subset(PulseVolume1, Magmaduration>1000000 & Magmaduration<1500000)

PulseVolume1520<- subset(PulseVolume1, Magmaduration>1500000 & Magmaduration<2000000)

PulseVolume20<- subset(PulseVolume1, Magmaduration>2000000)

Magmaduration7_5<- subset(Magmaduration, Pulses<10)

Magmaduration10<- subset(Magmaduration, Pulses>10 & Pulses<15)

Magmaduration12_5<- subset(Magmaduration, Pulses>15 & Pulses<20)

Magmaduration15<- subset(Magmaduration, Pulses>20)

MtCu_flux4<- subset(MtCu, log10flux< -4)

MtCu_flux35<- subset(MtCu, log10flux> -4 & log10flux< -3.5)

MtCu_flux3<- subset(MtCu, log10flux> -3.5 & log10flux< -3)

MtCu_flux265<- subset(MtCu, log10flux> -3 & log10flux< -2.65)

MtCu_flux2<- subset(MtCu, log10flux> -2.65 & log10flux< -2)

MtCu_flux15<- subset(MtCu, log10flux> -2 & log10flux< -1.5)

Magmaduration4<- subset(Magmaduration, log10flux< -4)

Magmaduration35<- subset(Magmaduration, log10flux> -4 & log10flux< -3.5)

Magmaduration3<- subset(Magmaduration, log10flux> -3.5 & log10flux< -3)

Magmaduration265<- subset(Magmaduration, log10flux> -3 & log10flux< -2.65)

Magmaduration2<- subset(Magmaduration, log10flux> -2.65 & log10flux< -2)

Magmaduration15<- subset(Magmaduration, log10flux> -2 & log10flux< -1.5)

############# PLOTS ###########

#### PLOT 1 #####

plot(MtCu_flux15, Magmaduration15, col = "red", xlim = c(0, 150), ylim = c(0, 2000000), xlab = "Cu (Mt)", ylab = "Overall duration of ore period (Myr)", cex=0.2)

points(MtCu_flux2, Magmaduration2, col = "pink", xlim = c(0, 150), ylim = c(0, 2000000), cex=0.2)

points(MtCu_flux265, Magmaduration265, col = "purple", xlim = c(0, 150), ylim = c(0, 2000000), cex=0.2)

points(MtCu_flux3, Magmaduration3, col = "lightgoldenrod2", xlim = c(0, 150), ylim = c(0, 2000000), cex=0.2)

points(MtCu_flux35, Magmaduration35, col = "pale green3", xlim = c(0, 150), ylim = c(0, 2000000), cex=0.2)

points(MtCu_flux4, Magmaduration4, col = "lightcyan2", xlim = c(0, 150), ylim = c(0, 2000000), cex=0.2)

# Add a legend

legend(-5, 2050000, legend=c("<-4", "-4 to -3.5", "-3.5 to -3", "-3 to -2.65", "-2.65 to -2", "-2 to -1.5"),

col=c("lightcyan2", "pale green3", "lightgoldenrod2", "purple", "pink", "red"), pch=19)

#### PLOT 2 #####

plot(MtCu, MagmaVol, cex=0.2)

#### PLOT 3

plot(MtCuVol50, log10fluxVol50, col = "lightcyan2", xlim = c(0, 170), ylim = c(-4.2, -1.5), xlab = "Cu (Mt)", ylab = "Log10magma flux (km3/a)", cex=0.2)

points(MtCuVol100, log10fluxVol100, col = "pale green3", xlim = c(0, 170), ylim = c(-4.2, -1.5), cex=0.2)

points(MtCuVol150, log10fluxVol150, col = "lightgoldenrod2", xlim = c(0, 170), ylim = c(-4.2, -1.5), cex=0.2)

points(MtCuVol300, log10fluxVol300, col = "purple", xlim = c(0, 170), ylim = c(-4.2, -1.5), cex=0.2)

points(MtCuVol350, log10fluxVol350, col = "pink", xlim = c(0, 170), ylim = c(-4.2, -1.5), cex=0.2)

# Add a legend

legend(110, -3.2, legend=c("Pulse volume <50 km3", "50-100 km3", "100-150 km3", "150-300 km3", ">300 km3"),

col=c("lightcyan2", "pale green3", "lightgoldenrod2", "purple", "pink"), pch=19)

#### PLOT 4

plot(MtCu, log10flux, col = "orange", ylim = c(-4.2, -1.5), xlab = "Cu (Mt)", ylab = "Log10magma flux (km3/a)", cex=0.2)

abline(h=-3, lwd=1, lty=2)

abline(h=-2.65, lwd=1, lty=2)

#### PLOT 5

flux10<- subset(flux, MtCu<10)

flux30<- subset(flux, MtCu>10 & MtCu<30)

flux50<- subset(flux, MtCu>30 & MtCu<50)

flux70<- subset(flux, MtCu>50 & MtCu<70)

flux100<- subset(flux, MtCu>70 & MtCu<100)

flux140<- subset(flux, MtCu>100)

MagmaVol10<- subset(MagmaVol, MtCu<10)

MagmaVol30<- subset(MagmaVol, MtCu>10 & MtCu<30)

MagmaVol50<- subset(MagmaVol, MtCu>30 & MtCu<50)

MagmaVol70<- subset(MagmaVol, MtCu>50 & MtCu<70)

MagmaVol100<- subset(MagmaVol, MtCu>70 & MtCu<100)

MagmaVol140<- subset(MagmaVol, MtCu>100)

plot(flux10, MagmaVol10, col = "lightcyan2", xlim = c(0.0001, 0.1), ylim = c(100, 4000), xlab = "Log10magma flux (km3/a)", ylab = "Magma Volume (km3)", cex=0.2, log = "xy", xaxp=c(0.0001, 1, 1))

points(flux30, MagmaVol30, col = "pale green3", xlim = c(0.0001, 0.1), ylim = c(100, 4000), cex=0.2)

points(flux50, MagmaVol50, col = "lightgoldenrod2", xlim = c(0.0001, 0.1), ylim = c(100, 4000), cex=0.2)

points(flux70, MagmaVol70, col = "purple", xlim = c(0.0001, 0.1), ylim = c(100, 4000), cex=0.2)

points(flux100, MagmaVol100, col = "pink", xlim = c(0.0001, 0.1), ylim = c(100, 4000), cex=0.2)

points(flux140, MagmaVol140, col = "coral2", xlim = c(0.0001, 0.1), ylim = c(100, 4000), cex=0.2)

abline(v=0.001, lwd=1, lty=2)

abline(v=0.0022, lwd=1, lty=2)

# Add a legend

legend(0.02, 550, legend=c("Cu < 10 Mt", "Cu 10-30 Mt", "Cu 30-50 Mt", "Cu 50-70 Mt", "Cu 70-100 Mt", "Cu > 100 Mt"),

col=c("lightcyan2", "pale green3", "lightgoldenrod2", "purple", "pink", "coral2"), pch=19)

### HISTOGRAMS

hist(log10fluxCu140, prob=TRUE)

hist(log10fluxCu100, prob=TRUE)

hist(log10fluxCu70, prob=TRUE)

hist(log10fluxCu50, prob=TRUE)

hist(log10fluxCu30, prob=TRUE)

hist(log10fluxCu10, prob=TRUE)

hist(log10fluxCu140, prob=TRUE, col="null", border ="null", xlim = c(-4.5, -1.3))

lines(density(log10fluxCu140), col= "coral2", lwd=3)

lines(density(log10fluxCu100), col= "pink", lwd=3)

lines(density(log10fluxCu70), col= "purple", lwd=3)

lines(density(log10fluxCu50), col= "lightgoldenrod2", lwd=3)

lines(density(log10fluxCu30), col= "pale green3", lwd=3)

lines(density(log10fluxCu10), col= "lightcyan2", lwd=3)

abline(v=-3, lwd=1, lty=2)

abline(v=-2.65, lwd=1, lty=2)

# Add a legend

legend(-2, 1.15, legend=c("Cu < 10 Mt", "Cu 10-30 Mt", "Cu 30-50 Mt", "Cu 50-70 Mt", "Cu 70-100 Mt", "Cu > 100 Mt"),

col=c("lightcyan2", "pale green3", "lightgoldenrod2", "purple", "pink", "coral2"), pch=19)

##### PROPORTIONS CALCULATIONS

subset1<- log10fluxCu10[log10fluxCu10< -2.65]

subset2<- log10fluxCu10[log10fluxCu10> -3 & log10fluxCu10< -2.65]
